# Supplementary material
Source: Springer Nature journal article supplement (https://www.springermedizin.de/resource/supplementary/13054_2012_1921_MOESM1_ESM.pdf/9711884)
Supplement: MOESM1 [file 9711884]

Full-term neonates 0 – 28 days treated  
with ECMO  
January 1992 – January 2006:  
*n*=282

Neonates excluded:  
Routine continuous hemofiltration *n*=35  
Inadequate clinical data *n*=3  
Congenital renal anomalies *n*=2

Neonates included:  
*n*=242

Survivors  
*n*=179

Non-survivors  
*n*=63

Early  
Non-survivors  
<24h post-ECMO  
*n*=30

Late  
Non-survivors  
>24h post-ECMO  
*n*=33

Non-AKI *n*=69  
Risk *n*=59  
Injury *n*=42  
Failure *n*=9

Non-AKI *n*=9  
Risk *n*=4  
Injury *n*=8  
Failure *n*=9

Non-AKI *n*=11  
Risk *n*=9  
Injury *n*=5  
Failure *n*=8
